# Supplementary material for: Deoxynivalenol: Toxicology, Degradation by Bacteria, and Phylogenetic Analysis
Source: MDPI journal article supplement (doi:10.3390/toxins14020090), 2022-01-25
Supplement: s1 [file s1]

# Deoxynivalenol: Toxicology, Degradation by Bacteria, and Phylogenetic Analysis

Anne Caroline Schoch Marques Pinto, Camilla Reginatto De Pierri, Alberto Gonçalves Evangelista, Ana Silva de Lara Pires Batista Gomes and Fernando Bittencourt Luciano

**Table S1.** 16S rRNA gene sequences of DON degrading bacteria provided in each study.

| Organism                                   | Strain    | Names used in Figure 4                      | Accession Number | Study        |
|--------------------------------------------|-----------|---------------------------------------------|------------------|--------------|
| <i>Acinetobacter</i> sp.                   | A21       | <i>Acinetobacter</i> sp. A21                | AM179861.1       | [72]         |
| <i>Bacterium</i> sp.                       | E3-39     | <i>Agrobacterium-rhizobium</i> E3-39        | KJ680277.1       | [69]         |
| <i>Anaerofilum agile</i>                   | F         | <i>Anaerofilum agile</i> F                  | NR_029315.1      | [77]         |
| <i>Ancylobacter</i> sp.                    | AS1.1761  | <i>Ancylobacter</i> sp. AS1.1761            | AY056830.1       | [86]         |
| <i>Bacillus arbutinivorans</i>             | -         | <i>Bacillus arbutinivorans</i>              | AF519469.1       | [77]         |
| <i>Bacillus</i> sp.                        | C81       | <i>Bacillus</i> sp. C81                     | AM179887.1       | [77][112]    |
| <i>Citrobacter</i> sp.                     | HXL0318   | <i>Citrobacter</i> sp. HXL0318              | MN419325.1       | Unpublished* |
| <i>Collinsella</i> sp.                     | RCA56-68  | <i>Collinsella</i> sp. RCA56-68             | AB031063.1       | [77]         |
| <i>Coriobacterium</i> sp.                  | EKSO3     | <i>Coriobacterium</i> sp. EKSO3             | AJ245921.1       | [77]         |
| <i>Costridium</i> sp.                      | -         | <i>Clostridium</i> sp.                      | L23477.1         | [113]*       |
| <i>Devosia insulae</i>                     | A16       | <i>Devosia insulae</i> A16                  | EU794908.1       | [60]         |
| <i>Devosia</i> sp.                         | D6-9      | <i>Devosia</i> sp. D6-9                     | NZ_CP045919.1    | [83]         |
| <i>Devosia</i> sp.                         | 17-2-E-8  | <i>Devosia</i> sp.17-2-E-8                  | KJ572863.1       | [78][79]     |
| <i>Devosia</i> sp.                         | RV12-1-1  | <i>Devosia</i> sp. RV12-1-1                 | MT520548.1       | [82]         |
| <i>Eggerthellaceae bacterium Marseille</i> | P2849     | <i>Eggerthellaceae bacterium</i> P2849      | LT576395.1       | [84]         |
| <i>Enterococcus</i> sp.                    | -         | <i>Enterococcus</i> sp.                     | AJ132470.1       | [114]*       |
| <i>Gemmata</i> sp.                         | 28IL      | <i>Gemmata</i> sp.28IL                      | KC169940.1       | [72]         |
| <i>Lysobacter</i> sp.                      | S1        | <i>Lysobacter</i> sp. S1                    | MN197751         | [92]         |
| <i>Nocardioides</i> sp.                    | ZHH-013   | <i>Nocardioides</i> sp. ZHH-013             | MW493343.1       | [87]         |
| <i>Nocardioides</i> sp.                    | NSM-2     | <i>Nocardioides</i> sp. NSM-2               | MZ436976.1       | [82]         |
| <i>Nocardioides</i> sp.                    | WSN05-2   | <i>Nocardioides</i> sp. WSN05-2             | AB282680.1       | [70]         |
| <i>Paradevosia shaoguanensis</i>           | DDB001    | <i>Paradevosia shaoguanensis</i> DDB001     | NZ_CP068983.1    | [88]         |
| <i>Pelagibacterium halotolerans</i>        | ANSP101   | <i>Pelagibacterium halotolerans</i> ANSP101 | MN795607.1       | [89]         |
| <i>Pseudomonas</i> sp.                     | C21       | <i>Pseudomonas</i> sp. C21                  | AM179883.1       | [90]         |
| <i>Pseudomonas</i> sp.                     | Y1        | <i>Pseudomonas</i> sp. Y1                   | MN197750         | [92]         |
| <i>Serratia</i> sp.                        | EWG9      | <i>Serratia</i> sp. EWG9                    | MW205826.1       | Unpublished* |
| <i>Slackia equolifaciens</i>               | DZE       | <i>Slackia equolifaciens</i> DZE            | NR_116295.1      | [96]         |
| <i>Sphingomonas</i> sp.                    | KSM1      | <i>Sphingomonas</i> sp. KSM1                | AB744218.1       | [95]         |
| <i>Sphingomonas</i> sp.                    | S3-4      | <i>Sphingomonas</i> sp. S3-4                | KY575150.1       | [94]         |
| <i>Stenotrophomonas</i> sp.                | OBA 2.13  | <i>Stenotrophomonas</i> sp. OBA-2-13        | OK039227.1       | [97]         |
| <i>Streptomyces</i> sp.                    | V003      | <i>Streptomyces</i> sp. V003                | MH298059.1       | Unpublished* |
| Uncultured bacterium clone B778            | B778      | B778 Clostidiales                           | AY984815.1       | [77]         |
| Uncultured bacterium clone p-662-A5        | p-662-A5  | p-662-A5 Clostidiales                       | AF371567.1       | [77]         |
| Uncultured <i>Blautia</i> sp.              | CSMB_3048 | <i>Blautia</i> sp. CSMB-3048                | MF896357.1       | [97]         |
| Uncultured <i>Desulfitobacterium</i>       | CSMB_3431 | <i>Desulfitobacterium</i> sp. CSMB-3431     | MF896716.1       | [90]         |
| Uncultured <i>Leadbetterella</i> sp.       | OTU2305   | <i>Leadbetterella</i> sp.                   | LT858987.1       | [72]         |
| Uncultured <i>Methylophilus</i> sp.        | SV424     | <i>Methylophilus</i> sp.                    | JQ858779.1       | [86]         |
| Uncultured <i>Stenotrophomonas</i>         | CSMB_1364 | <i>Stenotrophomonas</i> sp. CSMB_1364       | MF894792.1       | [23]         |
| Unidentified bacterium clone CCCM83        | CCCM83    | CCCM83- <i>Anaerumfilum</i>                 | AY654968.1       | [77]         |

\*These genera were used in the study by Islam and colleagues [24]

**Table S2.** 16S rRNA gene sequences of DON degrading bacteria and other bacteria used in each phylogenetic study provided in the articles.

| Organisms                               | Strain     | Accession Number | Characterized or cited by |
|-----------------------------------------|------------|------------------|---------------------------|
| <i>Acinetobacter</i> sp.                | A21        | AM179861.1       | [72]                      |
| <i>Achromobacter marplatensis</i>       | R-46660    | NR_117614        |                           |
| <i>Burkholderia multivorans</i>         | Struelens  | NR_029358.1      |                           |
| <i>Gemmata</i> sp.                      | 28IL       | KC169940.1       |                           |
| Uncultured <i>Leadbetterella</i> sp.    | OUT2305    | LT858987.1       |                           |
| <i>Bacterium</i> sp.                    | E3-39      | KJ680277.1       | [69]                      |
| <i>Pseudomonas aeruginosa</i>           | -          | X06684.1         |                           |
| <i>Pseudomonas andropogonis</i>         | -          | X67037.1         |                           |
| <i>Bacillus subtilis</i>                | -          | X00007           |                           |
| <i>Escherichia coli</i>                 | -          | J01859.1         |                           |
| <i>Pseudomonas caryophylli</i>          | -          | X67039.1         |                           |
| <i>Acetobacter aceti</i>                | -          | X74066.1         |                           |
| <i>Azospirillum lipoferum</i>           | Ncimb11861 | Z29619.1         |                           |
| <i>Sphingomonas adhaesiva</i>           | -          | D16146           |                           |
| <i>Bradyrhizobium japonicum</i>         | -          | U69638.3         |                           |
| <i>Blastobacter denitrificans</i>       | LMG 8443   | S46917           |                           |
| <i>Rhodopseudomonas pseudopalustris</i> | DSM 123    | L11664.1         |                           |
| <i>Methylobacterium extorquens</i>      | JCM 2802   | D32224           |                           |
| <i>Agrobacterium</i> sp.                | -          | AB006037         |                           |
| <i>Agrobacterium rubi</i>               | LMG 156    | X67228.1         |                           |
| <i>Agrobacterium tumefaciens</i>        | -          | D14500.1         |                           |
| <i>Agrobacterium vitis</i>              | LMG 8750   | X67225.2         |                           |
| <i>Rhizobium galegae</i>                | LMG 6214   | X67226.2         |                           |
| <i>Rhizobium tropici</i>                | LMG 9518   | X67233.1         |                           |
| <i>Mesorhizobium loti</i>               | LMG 6125   | X67229.2         |                           |
| <i>Rhizobium tropici</i>                | IAM 14206  | D12798.1         | [77]                      |
| <i>Agrobacterium rhizogenes</i>         | IAM 13570  | D12788.1         |                           |
| <i>Mesorhizobium huakuii</i>            | IFO 15243  | D13431.1         |                           |
| <i>Anaerofilum agile</i>                | F          | NR_029315.1      |                           |
| <i>Bacillus arbutinivorans</i>          | -          | AF519469.1       |                           |
| <i>Bacillus</i> sp.                     | C81        | AM179887.1       |                           |
| <i>Collinsella</i> sp.                  | RCA56-68   | AB031063.1       |                           |
| <i>Coriobacterium</i> sp.               | EKSO3      | AJ245921.1       |                           |
| Uncultured bacterium clone B778         | B778       | AY984815.1       |                           |
| Uncultured bacterium clone p-662-A5     | p-662-A5   | AF371567.1       |                           |
| Unidentified bacterium clone CCCM83     | CCCM83     | AY654968.1       | [86]                      |
| <i>Ancylobacter</i> sp.                 | AS1.1761   | AY056830.1       |                           |
| Uncultured <i>Methylophilus</i> sp.     | SV424      | JQ858779.1       |                           |
| <i>Hyphomicrobium nitrativorans</i>     | NL23       | NR_121713.2      |                           |
| <i>Acidovorax wautersii</i>             | NF 1078    | NR_118410.1      |                           |
| <i>Prosthecomicrobium hirschii</i>      | 16         | NR_104906.1      |                           |
| <i>Taonella mepensis</i>                | H1         | NR_132292.1      |                           |
| <i>Bosea thiooxidans</i>                | BI-42      | NR_114668        |                           |
| <i>Terrimonas soli</i>                  | FL-8       | NR_159891        |                           |
| <i>Citrobacter</i> sp.                  | HXL0318    | MN419325.1       | Unpublished               |
| <i>Costridium</i> sp.                   | -          | L23477.1         | [113]                     |
| <i>Devosia insulae</i>                  | A16        | EU794908.1       | [60]                      |
| <i>Devosia</i> sp                       | D6-9       | NZ_CP045919.1    | [83]                      |

|                                            |               |             |      |
|--------------------------------------------|---------------|-------------|------|
| <i>Devosia</i> sp.                         | 17-2-E-8      | KJ572863.1  |      |
| <i>Devosia soli</i>                        | GH2-10        | DQ303125.1  |      |
| <i>Devosia crocina</i>                     | IPL20         | EF433461.1  |      |
| <i>Devosia riboflavina</i>                 | DSM 7230      | AJ549086.1  |      |
| <i>Devosia subaequoris</i>                 | HST3-14       | AM293857.1  |      |
| <i>Devosia lucknowensis</i>                | L15           | JN687580.1  |      |
| <i>Devosia chinhatensis</i>                | IPL18         | EF433462.1  |      |
| <i>Devosia epidermidihirudinis</i>         | E84T          | KC254735.1  |      |
| <i>Devosia</i> sp                          | R-21940T      | AJ786801.1  |      |
| <i>Devosia submarina</i>                   | SI74          | AB712348.1  |      |
| <i>Devosia psychrophila</i>                | Cr7-05        | GU441678.1  |      |
| <i>Devosia glacialis</i>                   | Cr4-44        | HM474794.1  |      |
| <i>Devosia yakushimensis</i>               | -             | AB361068.1  |      |
| <i>Devosia neptuniae</i>                   | J1            | AF469072.1  |      |
| <i>Devosia insulae</i>                     | DS-56         | EF012357.1  |      |
| <i>Devosia humi</i>                        | -             | KM598259.1  |      |
| <i>Prosthecomicrobium enhydrium</i>        | 9b            | GQ221761.1  |      |
| <i>Prosthecomicrobium mishustinii</i>      | 17            | FJ560749.1  |      |
| <i>Devosia pacifica</i>                    | NH131         | KF111722.1  |      |
| <i>Devosia geojensis</i>                   | BD-c194       | EF575560.1  | [79] |
| <i>Devosia</i> sp.                         | BBB001        | JX392051.1  |      |
| <i>Devosia albogilva</i>                   | IPL15         | EF433460.1  |      |
| <i>Devosia honganensis</i>                 | NSL10         | KP339871.1  |      |
| <i>Youhaiella tibetensis</i>               | fig4          | KF740588.1  |      |
| <i>Paradevosia shaoguanensis</i>           | J5-3          | KC222641.1  |      |
| <i>Pelagibacterium luteolum</i>            | 1_C16_27      | EF540455.1  |      |
| <i>Pelagibacterium halotolerans</i>        | B2            | EU709017.1  |      |
| <i>Cucumibacter marinus</i>                | DSM 18995     | EF211830.2  |      |
| <i>Zhangella mobilis</i>                   | E6            | EU255260.1  |      |
| <i>Maritalea myrionectae</i>               | CL-SK30       | EF988631.1  |      |
| <i>Carbophilus carboxidus</i>              | CIP 105722    | JN175336.1  |      |
| <i>Aminobacter aminovorans</i>             | DSM7048T,     | AJ011759.1  |      |
| <i>Pseudaminobacter salicylatoxidans</i>   | -             | AF072542.1  |      |
| <i>Nitratreductor aquibiodomus</i>         | NL21          | AF534573.1  |      |
| <i>Nitratreductor pacificus</i>            | pht-3B        | DQ659453.1  |      |
| <i>Blastochloris viridis</i>               | -             | D25314.1    |      |
| <i>Rhodoplanes roseus</i>                  | -             | D25313.2    |      |
| <i>E.coli</i>                              | ATCC 11775T   | X80725.1    |      |
| <i>Devosia</i> sp.                         | RV12-1-1      | MT520548.1  |      |
| <i>Nocardioides</i> sp.                    | NSM-2         | MZ436976.1  | [82] |
| <i>Eggerthellaceae bacterium Marseille</i> | P2849         | LT576395.1  |      |
| <i>Gordonibacter urolithinfaciens</i>      | AA00211       | LT223667.1  |      |
| <i>Gordonibacter urolithinfaciens</i>      | CEBAS 1/15P   | NR_134044.1 |      |
| <i>Gordonibacter faecihominis</i>          | CAT-2         | KF785806.1  |      |
| <i>Gordonibacter pamelaee</i>              | JCM 16334     | NR_113189.1 |      |
| <i>Gordonibacter</i> sp. Marseille-P2775   | P2775         | LT558845.1  |      |
| <i>Eggerthella</i> sp.                     | YY7918        | AB379693.1  | [84] |
| <i>Gordonibacter</i> sp. Marseille-P3078   | P3078         | LT598545.1  |      |
| <i>Eggerthella sinensis</i>                | JCM14551      | NR_042840.1 |      |
| <i>Eggerthella timonensis</i>              | P3135T        | LT598568.1  |      |
| <i>Eggerthella lenta</i>                   | AUH-Julong365 | JN874873.1  |      |
| <i>Eggerthella lenta</i>                   | CAT-1         | JF798636.1  |      |
| <i>Eggerthella lenta</i>                   | 1899B         | NR_037089.1 |      |

|                                                  |             |             |       |
|--------------------------------------------------|-------------|-------------|-------|
| <i>Eggerthella lenta</i>                         | JCM 9979    | NR_113158.1 |       |
| <i>Eggerthellaceae bacterium Marseille-P2849</i> | P2849       | LT576395.1  |       |
| <i>Escherichia coli</i>                          | 44A         | KP789331.1  |       |
| <i>Enterococcus</i> sp.                          | -           | AJ132470.1  | [114] |
| <i>Lysobacter</i> sp.                            | S1          | MN197751    |       |
| <i>Pseudomonas</i> sp.                           | Y1          | MN197750    |       |
| <i>Pseudomonas</i> sp.                           | PVR-YHB-1-2 | KP986946.1  |       |
| <i>Pseudomonas</i> sp.                           | CoA5        | Ky094373    |       |
| <i>Pseudomonas resinovorans</i>                  | SS1         | KP453781.1  |       |
| <i>Pseudomonas</i> sp.                           | CMF-14      | MG266389.1  |       |
| <i>Pseudomonas</i> sp.                           | MI-45a      | DQ180955.1  |       |
| <i>Pseudomonas</i> sp.                           | XT-29       | KR063557.1  |       |
| <i>Pseudomonas</i> sp.                           | HI-G1       | DQ205300.1  |       |
| <i>Pseudomonas aeruginosa</i>                    | PP-10       | KF186662.1  |       |
| <i>Pseudomonas</i> sp.                           | BPS-8       | C273520.1   |       |
| <i>Pseudomonas</i> sp.                           | J11         | AB097174.1  |       |
| <i>Pseudomonas resinovorans</i>                  | LAM 9       | EU019983.1  |       |
| <i>Pseudomonas pseudoalcaligenes</i>             | X4          | KJ586277.1  | [92]  |
| <i>Pseudomonas alcaligenes</i>                   | -           | FJ455454.1  |       |
| <i>Pseudomonas</i> sp.                           | C2-AL       | LN913074.1  |       |
| <i>Lysobacter</i> sp.                            | MHS03       | DQ993327.1  |       |
| <i>Lysobacter</i> sp.                            | Sq12        | KX255010.1  |       |
| <i>Lysobacter enzymogenes</i>                    | SEMP3       | JX915820.1  |       |
| <i>Lysobacter enzymogenes</i>                    | BB14        | FJ657670.1  |       |
| <i>lysobacter gummosus</i>                       | CP72        | KF040972.1  |       |
| <i>Lysobacter</i> sp.                            | DC2b-58     | AB552868.1  |       |
| <i>Lysobacter</i> sp.                            | R5-394      | JQ659762.1  |       |
| <i>Lysobacter niastensis</i>                     | TSH57       | MG600267.1  |       |
| <i>Lysobacter panacisoli</i>                     | SR-15       | KX082844.1  |       |
| <i>Lysobacter</i> sp.                            | GK19        | MK424386.1  |       |
| <i>Lysobacter</i> sp.                            | QT22        | GU385868.1  |       |
| <i>Nocardioides</i> sp.                          | ZHH-013     | MW493343.1  |       |
| <i>Nocardioides</i> sp.                          | THG-DN5.4   | KM035951.2  |       |
| <i>Nocardioides nitrophenolicus</i>              | NSP 41      | AF005024.1  |       |
| <i>Nocardioides kongjuensis</i>                  | A2-4        | DQ218275.1  |       |
| <i>Nocardioides albidus</i>                      | -           | KM073954.1  |       |
| <i>Nocardioides</i> sp.                          | MN8         | FJ423551.1  | [87]  |
| <i>Nocardioides vastitatis</i>                   | -           | MK787305.1  |       |
| <i>Nocardioides pelophilus</i>                   | THG-T63     | KY287247.1  |       |
| <i>Nocardioides</i> sp.                          | LS1         | AB627759.1  |       |
| <i>Escherichia coli</i>                          | NBRC 102203 | AB681728.1  |       |
| <i>Nocardioides</i> sp.                          | WSN05-2     | AB282680.1  |       |
| <i>Nocardioides aquiterrae</i>                   | GW-9        | AF529063.1  |       |
| <i>Nocardioides</i> sp.                          | OS4         | U61298.1    |       |
| <i>Nocardioides kribbensis</i>                   | KSL-2       | AY835924.1  |       |
| <i>Nocardioides aestuari</i>                     | JC2056      | AY423719.2  |       |
| <i>Nocardioides</i> sp.                          | AN3         | AB183711.2  |       |
| <i>Nocardioides plantarum</i>                    | NCIMB 12834 | AF005008.1  | [70]  |
| <i>Nocardioides kongjuensis</i>                  | A2-4        | DQ218275.1  |       |
| <i>Nocardioides panaciterrae</i>                 | -           | AB257719.1  |       |
| <i>Nocardioides alkalitolerans</i>               | KSL-1       | AY633969.1  |       |
| <i>Nocardioides dubius</i>                       | -           | AY928902.1  |       |
| <i>Nocardioides jensenii</i>                     | -           | AF005006.1  |       |

|                                          |             |                |             |
|------------------------------------------|-------------|----------------|-------------|
| <i>Streptomyces coelicolor</i>           | -           | X60514.1       |             |
| <i>Paradevosia shaoguanensis</i>         | DDB001      | NZ_CP068983.1  | [88]        |
| <i>Pelagibacterium halotolerans</i>      | ANSP101     | MN795607.1     |             |
| <i>Pelagibacterium halotolerans</i>      | RB 47       | KJ939460.1     |             |
| <i>Devosia riboflavina</i>               | IFO 13584   | NR_115565.1    | [89]        |
| <i>Ancalomicrobium adetum</i>            | NBRC 102456 | NR_104726.1    |             |
| <i>Methylophilus multitrophicus</i>      | DM13        | NR_024844.1    |             |
| <i>Pseudomonas</i> sp.                   | C21         | AM179883.1     | [90]        |
| Uncultured <i>Desulfotomobacterium</i>   | CSMB_3431   | MF896716.1     |             |
| <i>Serratia</i> sp.                      | EWG9        | MW205826.1     | Unpublished |
| <i>Slackia equolifaciens</i>             | DZE         | NR_116295.1    |             |
| <i>Slackia faecicanis</i>                | 5WC12       | NR_042220.1    |             |
| <i>Slackia piriformis</i>                | YIT 12062   | NR_113272.1    |             |
| <i>Slackia exigua</i>                    | JCM 11022   | LC007113.1     |             |
| <i>Slackia</i> sp. NATTS                 | NATTS       | AB505075.1     |             |
| <i>Adlercreutzia</i> sp. Marseille-P7992 | -           | LR031293.1     |             |
| <i>Enterorhabdus</i> sp.                 | Z73         | MK287693.1     |             |
| <i>Enterorhabdus muris</i>               | D2-1X-25    | MK287668.1     | [96]        |
| <i>Adlercreutzia equolifaciens</i>       | FJC-D53     | AB306663.1     |             |
| <i>Asaccharobacter celatus</i>           | JCM 14811   | NR_114402      |             |
| <i>Paraeggerthella hongkongensis</i>     | W04014      | KP944194.1     |             |
| <i>Eggerthellaceae</i> bacterium         | AT8         | LN881601.1     |             |
| <i>Atopobium parvulum</i>                | -           | AF292372       |             |
| <i>Raoultibacter massiliensis</i>        | P2849       | NR_144751.1    |             |
| <i>Sphingomonas</i> sp.                  | KSM1        | AB744218.1     |             |
| <i>Sphingomonas panni</i>                | C52         | AJ575818.2     |             |
| <i>Sphingomonas mucosissima</i>          | CP173-2     | AM229669.1     |             |
| <i>Sphingomonas</i> sp. JSS-26           | JSS-26      | AF131296.1     |             |
| <i>Sphingomonas changbaiensis</i>        | V2M44       | EU682685.1     |             |
| <i>Sphingomonas pituitosa</i>            | EDIV        | AJ243751.1     |             |
| <i>Sphingomonas sanxanigenens</i>        | NX02        | DQ789172.1     |             |
| <i>Sphingomonas wittichii</i>            | RW1         | NR_027525.1    |             |
| <i>Sphingomonas fennica</i>              | K101        | NR_041948.1    |             |
| <i>Sphingobium yanoikuyae</i>            | -           | D13728.1       |             |
| <i>Sphingobium</i> sp. SYK-6             | SYK-6       | NC_015976.1    | [95]        |
| <i>Sphingomonas xenophaga</i>            | BN6         | X94098.1       |             |
| <i>Sphingomonas</i> sp. YT               | YT          | AB047364.1     |             |
| <i>Sphingobium rhizovicinum</i>          | CC-FH12-1   | EF465534.1     |             |
| <i>Novosphingobium aromaticivorans</i>   | DSM 12444   | NR_074261.1    |             |
| <i>Novosphingobium subterraneum</i>      | -           | AB025014.1     |             |
| <i>Novosphingobium panipatense</i>       | SM16        | EF424402.1     |             |
| <i>Sphingopyxis ginsengisoli</i>         | Gsoil 250   | AB245343.1     |             |
| <i>Sphingopyxis witflariensis</i>        | -           | AJ416410.1     |             |
| <i>Sphingobium japonicum</i>             | UT26S       | NR_102886.2    |             |
| <i>Sphingomonas</i> sp.                  | S3-4        | KY575150.1     | [94]        |
| <i>Stenotrophomonas</i> sp.              | OBA 2.13    | OK039227.1     |             |
| <i>Streptomyces</i> sp.                  | V003        | MH298059.1     |             |
| Uncultured <i>Blautia</i> sp.            | CSMB_3048   | MF896357.1     | [97]        |
| Uncultured <i>Stenotrophomonas</i>       | CSMB_1364   | MF894792.1     |             |
| <i>Streptomyces alkaliphilus</i>         | No. 7       | NR_136864      |             |
| <i>Citrobacter freundii</i>              | A47         | LNFS00000000.1 | [115]       |

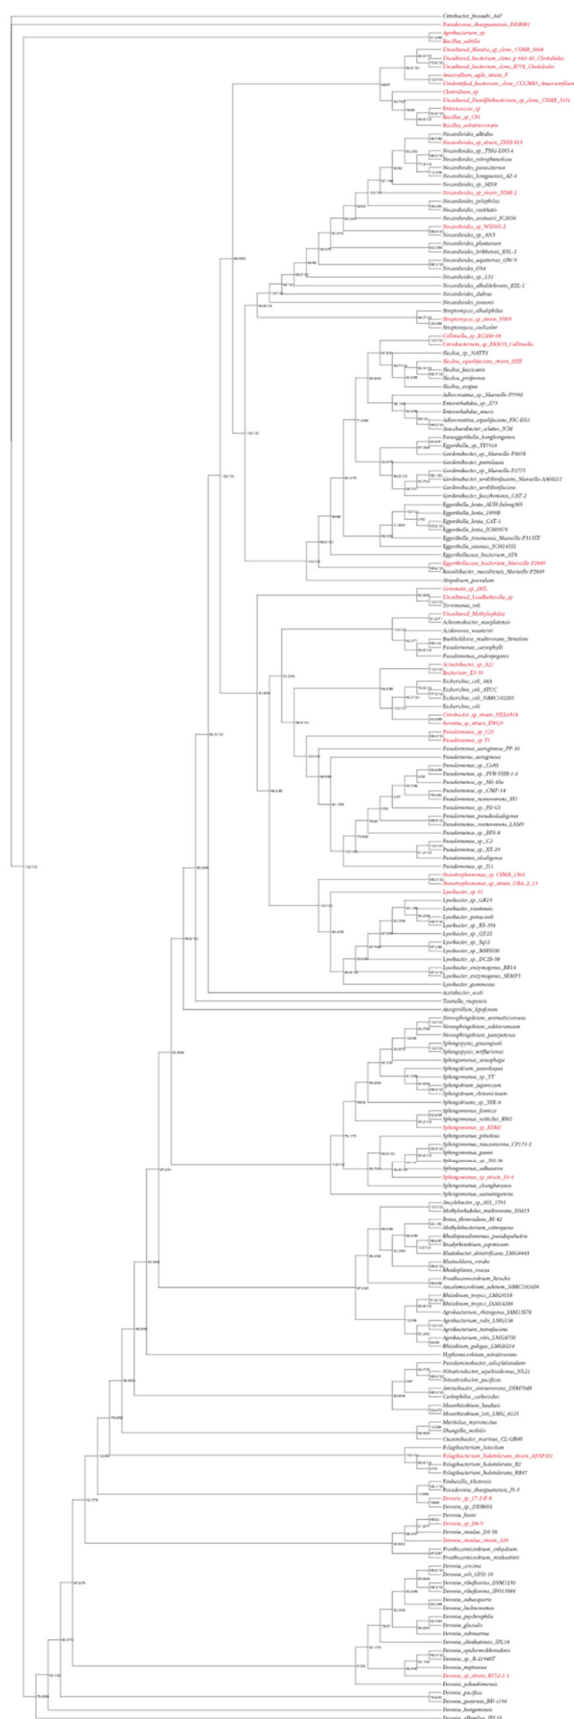

**Figure S1.** 16S rRNA genes from 205 organisms listed in Table S2. Highlighted (red) are the 39 organisms shown in Figure 4 and Table S1
